# Supplementary material for: Assessment of Metals Concentrations in Soils of Abu Dhabi Emirate Using Pollution Indices and Multivariate Statistics
Source: MDPI journal article supplement (doi:10.3390/toxics9050095), 2021-04-25
Supplement: s1 [file s1]

# Assessment of Metals Concentrations in Soils of Abu Dhabi Emirate Using Pollution Indices and Multivariate Statistics

Yousef Nazzal, Alina Bărbulescu, Fares Howari, Ahmed A. Al-Taani, Jibran Iqbal, Cijo M. Xavier, Manish Sharma and Cristian-Stefan Dumitriu

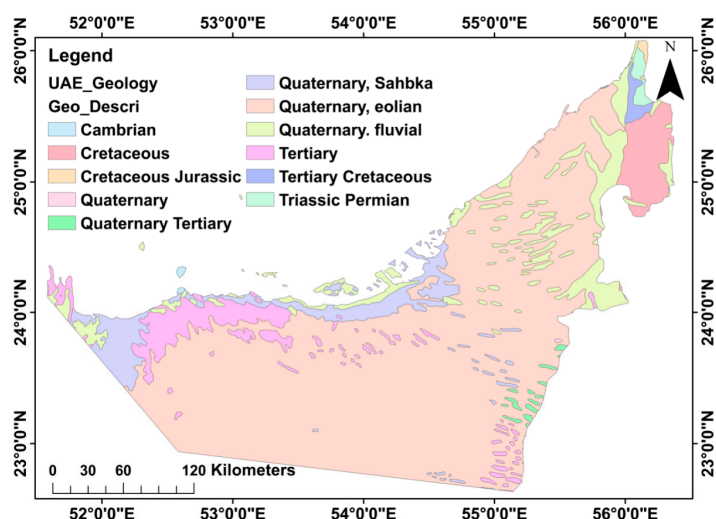

Figure S1. The geological map of the study area

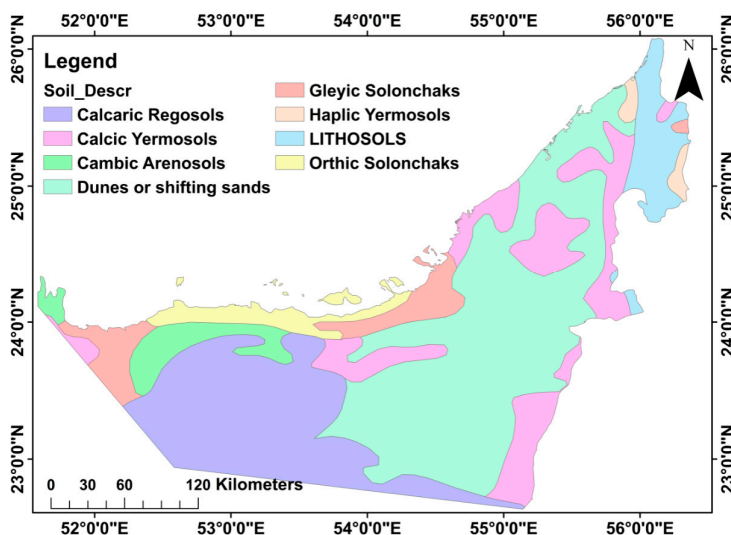

Figure S2. The soils map of the study area

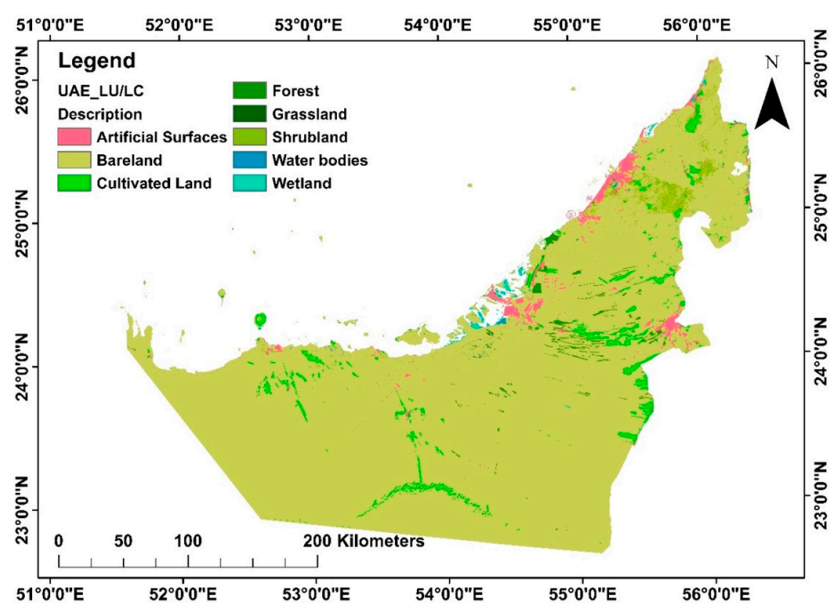

Figure S3. Land use map of the study area

|    | Cd    | Cu    | Ni    | Pb    | Zn    | Cr    | Co    | Ba    | Fe    | Mn    | As    | Al    | Ca    | Mg    | Na    | Sr    | K     |
|----|-------|-------|-------|-------|-------|-------|-------|-------|-------|-------|-------|-------|-------|-------|-------|-------|-------|
| Cd |       | 0.260 | 0.043 | 0.081 | 0.142 | 0.079 | 0.010 | 0.336 | 0.143 | 0.082 | 0.148 | 0.303 | 0.107 | 0.054 | 0.060 | 0.213 | 0.095 |
| Cu | 0.260 |       | 0.059 | 0.092 | 0.218 | 0.035 | 0.362 | 0.300 | 0.025 | 0.003 | 0.000 | 0.346 | 0.073 | 0.492 | 0.210 | 0.448 | 0.000 |
| Ni | 0.043 | 0.059 |       | 0.000 | 0.000 | 0.000 | 0.000 | 0.000 | 0.100 | 0.000 | 0.000 | 0.000 | 0.000 | 0.000 | 0.001 | 0.001 | 0.066 |
| Pb | 0.081 | 0.092 | 0.000 |       | 0.000 | 0.000 | 0.000 | 0.000 | 0.074 | 0.000 | 0.000 | 0.001 | 0.000 | 0.002 | 0.097 | 0.002 | 0.117 |
| Zn | 0.142 | 0.218 | 0.000 | 0.000 |       | 0.000 | 0.000 | 0.000 | 0.471 | 0.000 | 0.000 | 0.017 | 0.000 | 0.008 | 0.005 | 0.012 | 0.001 |
| Cr | 0.079 | 0.035 | 0.000 | 0.000 | 0.000 |       | 0.000 | 0.000 | 0.073 | 0.000 | 0.000 | 0.000 | 0.000 | 0.010 | 0.000 | 0.007 | 0.000 |
| Co | 0.010 | 0.362 | 0.000 | 0.000 | 0.000 | 0.000 |       | 0.003 | 0.000 | 0.001 | 0.018 | 0.019 | 0.000 | 0.000 | 0.000 | 0.051 | 0.436 |
| Ba | 0.336 | 0.300 | 0.000 | 0.000 | 0.000 | 0.000 | 0.003 |       | 0.336 | 0.000 | 0.000 | 0.011 | 0.000 | 0.007 | 0.091 | 0.014 | 0.111 |
| Fe | 0.143 | 0.025 | 0.100 | 0.074 | 0.471 | 0.073 | 0.000 | 0.336 |       | 0.045 | 0.015 | 0.011 | 0.498 | 0.000 | 0.395 | 0.218 | 0.001 |
| Mn | 0.082 | 0.003 | 0.000 | 0.000 | 0.000 | 0.000 | 0.001 | 0.000 | 0.045 |       | 0.000 | 0.000 | 0.000 | 0.006 | 0.002 | 0.002 | 0.000 |
| As | 0.148 | 0.000 | 0.000 | 0.000 | 0.000 | 0.000 | 0.018 | 0.000 | 0.015 | 0.000 |       | 0.000 | 0.000 | 0.031 | 0.001 | 0.033 | 0.000 |
| Al | 0.303 | 0.346 | 0.000 | 0.001 | 0.017 | 0.000 | 0.019 | 0.011 | 0.011 | 0.000 | 0.000 |       | 0.000 | 0.001 | 0.347 | 0.001 | 0.211 |
| Ca | 0.107 | 0.073 | 0.000 | 0.000 | 0.000 | 0.000 | 0.000 | 0.000 | 0.498 | 0.000 | 0.000 | 0.000 |       | 0.000 | 0.005 | 0.000 | 0.000 |
| Mg | 0.054 | 0.492 | 0.000 | 0.002 | 0.008 | 0.010 | 0.000 | 0.007 | 0.000 | 0.006 | 0.031 | 0.001 | 0.000 |       | 0.001 | 0.002 | 0.372 |
| Na | 0.060 | 0.210 | 0.001 | 0.097 | 0.005 | 0.000 | 0.000 | 0.091 | 0.395 | 0.002 | 0.001 | 0.347 | 0.005 | 0.001 |       | 0.045 | 0.001 |
| Sr | 0.213 | 0.448 | 0.001 | 0.002 | 0.012 | 0.007 | 0.051 | 0.014 | 0.218 | 0.002 | 0.033 | 0.001 | 0.000 | 0.002 | 0.045 |       | 0.342 |
| K  | 0.095 | 0.000 | 0.066 | 0.117 | 0.001 | 0.000 | 0.436 | 0.111 | 0.001 | 0.000 | 0.000 | 0.211 | 0.000 | 0.372 | 0.001 | 0.342 |       |

Figure S4. p-values corresponding to the correlation coefficients between the metals concentration

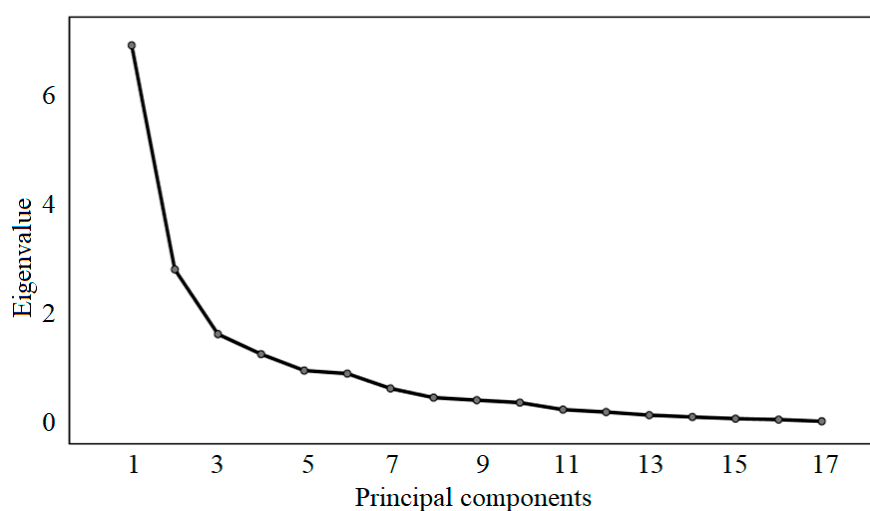

Figure S5. The scree plot

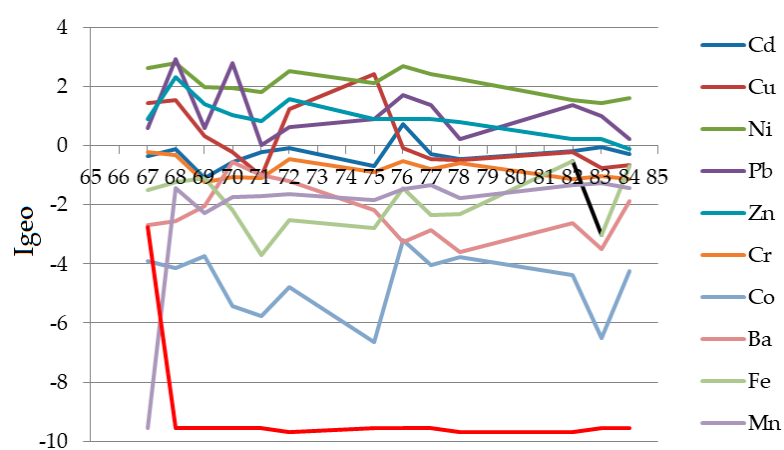

Figure S6. Igeo for the sites from cluster 3

**Table S1.** Geo-accumulation index (Igeo) for contamination levels, adapted from Muller [76]

| Igeo class | Igeo value           | Contamination level                    |
|------------|----------------------|----------------------------------------|
| 0          | $I_{geo} \leq 0$     | Uncontaminated                         |
| 1          | $0 < I_{geo} < 1$    | Uncontaminated/Moderately contaminated |
| 2          | $1 \leq I_{geo} < 2$ | Moderately contaminated                |
| 3          | $2 \leq I_{geo} < 3$ | Moderately/Strongly contaminated       |
| 4          | $3 \leq I_{geo} < 4$ | Strongly contaminated                  |
| 5          | $4 \leq I_{geo} < 5$ | Strongly/Extremely contaminated        |
| 6          | $I_{geo} \geq 5$     | Extremely contaminated                 |

**Table S2.** Average crustal abundance and average world soils concentrations [78,85–87].

| Element | Average crustal abundances<br>(mg/kg) [78,85,86] | Soils average<br>(mg/kg)[86,87] |
|---------|--------------------------------------------------|---------------------------------|
| Cd      | 0.2                                              | 0.5                             |
| Cu      | 55                                               | 20                              |
| Ni      | 75                                               | 40                              |
| Pb      | 20                                               | 10                              |
| Zn      | 75                                               | 50                              |
| Cr      | 100                                              | 100                             |
| Co      | 25                                               | 15                              |
| Ba      | 415                                              | 500                             |
| Fe      | 50000                                            | 3800                            |
| Mn      | 20900                                            | 850                             |
| As      | 1.8                                              | 5                               |
| Al      | 81300                                            | 5000                            |
| Ca      | 36300                                            | 13700                           |
| Mg      | 20900                                            | 500                             |
| Na      | 28300                                            | 6300                            |
| Sr      | 375                                              | 300                             |
| K       | 25900                                            | 14000                           |

**Table S3.** Results of the Principal Component Analysis – factors' importance.

| PC | Initial eigenvalues |              |                         | Extracted sums of squared loadings |              |                |
|----|---------------------|--------------|-------------------------|------------------------------------|--------------|----------------|
|    | Total               | Variance (%) | Cumulative Variance (%) | Total                              | Variance (%) | Cumulative (%) |
| 1  | 6.873               | 40.431       | 40.431                  | 6.873                              | 40.431       | 40.431         |
| 2  | 2.789               | 16.406       | 56.836                  | 2.789                              | 16.406       | 56.836         |
| 3  | 1.610               | 9.470        | 66.306                  | 1.610                              | 9.470        | 66.306         |
| 4  | 1.246               | 7.328        | 73.634                  | 1.246                              | 7.328        | 73.634         |
| 5  | 0.947               | 5.568        | 79.202                  |                                    |              |                |
| 6  | 0.891               | 5.239        | 84.441                  |                                    |              |                |
| 7  | 0.620               | 3.646        | 88.088                  |                                    |              |                |
| 8  | 0.454               | 2.669        | 90.757                  |                                    |              |                |
| 9  | 0.407               | 2.395        | 93.152                  |                                    |              |                |
| 10 | 0.362               | 2.131        | 95.283                  |                                    |              |                |
| 11 | 0.234               | 1.378        | 96.661                  |                                    |              |                |
| 12 | 0.190               | 1.118        | 97.779                  |                                    |              |                |
| 13 | 0.134               | 0.786        | 98.564                  |                                    |              |                |

|    |       |       |         |
|----|-------|-------|---------|
| 14 | 0.100 | 0.590 | 99.154  |
| 15 | 0.070 | 0.409 | 99.563  |
| 16 | 0.053 | 0.310 | 99.873  |
| 17 | 0.022 | 0.127 | 100.000 |

Table S4. Principal components.

| Element | PC1          | PC2           | PC3           | PC4           |
|---------|--------------|---------------|---------------|---------------|
| Mn      | <b>0.905</b> | −0.340        | 0.006         | −0.026        |
| Cr      | <b>0.872</b> | −0.267        | −0.023        | 0.083         |
| Ca      | <b>0.869</b> | −0.037        | −0.070        | −0.323        |
| Ni      | <b>0.861</b> | 0.283         | −0.202        | 0.176         |
| As      | <b>0.810</b> | −0.477        | 0.119         | −0.044        |
| Zn      | <b>0.767</b> | 0.035         | −0.295        | 0.285         |
| Pb      | <b>0.729</b> | 0.258         | −0.390        | 0.114         |
| Ba      | <b>0.668</b> | 0.139         | −0.403        | 0.103         |
| Co      | <b>0.564</b> | <b>0.562</b>  | 0.378         | 0.206         |
| Na      | 0.427        | 0.003         | 0.413         | 0.407         |
| Fe      | 0.062        | <b>0.800</b>  | 0.328         | −0.127        |
| K       | 0.548        | <b>−0.694</b> | 0.307         | 0.055         |
| Mg      | 0.508        | <b>0.608</b>  | 0.480         | −0.075        |
| Cu      | −0.152       | <b>0.566</b>  | <b>−0.524</b> | 0.239         |
| Cd      | 0.230        | 0.101         | 0.348         | 0.207         |
| Al      | 0.480        | 0.188         | −0.034        | <b>−0.616</b> |
| Sr      | 0.458        | 0.182         | −0.070        | <b>−0.532</b> |

Rotation Method: Oblimin with Kaiser Normalization.

Table S5. Rotated factor loading matrix.

| Element | PC1          | PC2          | PC3           | PC4          |
|---------|--------------|--------------|---------------|--------------|
| Mn      | <b>0.606</b> | 0.110        | <b>0.696</b>  | 0.268        |
| Cr      | <b>0.645</b> | 0.149        | <b>0.607</b>  | 0.176        |
| Ca      | <b>0.559</b> | 0.137        | 0.421         | <b>0.599</b> |
| Ni      | <b>0.842</b> | 0.352        | 0.097         | 0.225        |
| As      | 0.460        | 0.069        | <b>0.800</b>  | 0.202        |
| Zn      | <b>0.833</b> | 0.145        | 0.206         | 0.036        |
| Pb      | <b>0.828</b> | 0.145        | −0.021        | 0.232        |
| Ba      | 0.774        | 0.045        | 0.039         | 0.190        |
| Co      | 0.337        | <b>0.827</b> | −0.025        | 0.142        |
| Na      | 0.213        | <b>0.545</b> | 0.356         | −0.220       |
| Fe      | −0.084       | <b>0.670</b> | −0.460        | 0.318        |
| K       | 0.154        | 0.026        | <b>0.925</b>  | −0.026       |
| Mg      | 0.147        | <b>0.833</b> | −0.038        | 0.383        |
| Cu      | 0.345        | −0.041       | <b>−0.734</b> | −0.121       |
| Cd      | 0.045        | 0.435        | 0.168         | −0.077       |
| Al      | 0.185        | 0.078        | 0.083         | <b>0.773</b> |
| Sr      | 0.212        | 0.065        | 0.065         | <b>0.695</b> |
